Acute and chronic gregarisation are associated  
with distinct DNA methylation fingerprints in  
desert locusts

Eamonn B. Mallon<sup>1</sup>, Harindra E. Amarasinghe<sup>2</sup>, and Swidbert R.  
Ott<sup>3\*</sup>

<sup>1</sup>Department of Genetics, University of Leicester, University Road,  
Leicester, LE1 7RH, United Kingdom.

<sup>2</sup>Academic Unit of Cancer Genomics, Faculty of Medicine, University  
of Southampton, Southampton, SO17 1BJ, United Kingdom.

<sup>3</sup>Department of Neuroscience, Psychology and Behaviour, University  
of Leicester, University Road, Leicester, LE1 7RH, United Kingdom.

---

\*Corresponding author: [S.R.Ott@cantab.net](mailto:S.R.Ott@cantab.net)

1

## Abstract

2 Desert locusts (*Schistocerca gregaria*) show a dramatic form of socially  
3 induced phenotypic plasticity known as phase polyphenism. In the  
4 absence of conspecifics, locusts occur in a shy and cryptic solitary  
5 phase. Crowding with conspecifics drives a behavioural transforma-  
6 tion towards gregariousness that occurs within hours and is followed  
7 by changes in physiology, colouration and morphology, resulting in the  
8 full gregarious phase syndrome. We analysed methylation-sensitive  
9 amplified fragment length polymorphisms (MS-AFLP) to compare the  
10 effect of acute and chronic crowding on DNA methylation in the cen-  
11 tral nervous system. We find that crowd-reared and solitary-reared  
12 locusts show markedly different neural MS-AFLP fingerprints. How-  
13 ever, crowding for a day resulted in neural MS-AFLP fingerprints that  
14 were clearly distinct from both crowd-reared and uncrowded solitary-  
15 reared locusts. Our results indicate that changes in DNA methylation  
16 associated with behavioural gregarisation proceed through intermedi-  
17 ate states that are not simply partial realisations of the endpoint states.

18 **Keywords:** epigenetics, methylation-sensitive amplified fragment length  
19 polymorphisms, MS-AFLP, phase change, *Schistocerca gregaria*.

## 20 Introduction

21 Modification of neural DNA by cytosine methylation is emerging as an im-  
22 portant mechanism in tailoring behavioural phenotypes to environmental  
23 conditions, including the social environment [1–4]. In most instances, how-  
24 ever, the mechanistic role of DNA methylation in the chain of events from  
25 environmental signals to changes in behavioural phenotype is still poorly un-  
26 derstood [4]. To what extent are changes in DNA methylation responsible  
27 for bringing about behavioural change, as opposed to serving to consolidate

28 changes that first arose through other mechanisms? This is related to an  
29 even more fundamental question in understanding phenotypic transitions:  
30 are individuals in transition simply intermediates between more extreme  
31 endpoints, or are they better understood as ‘third states’? The answer  
32 may differ at different levels of analysis, as similar behavioural states may  
33 be underpinned by different mechanistic states.

34 Phenotypic plasticity is particularly common in insects, a fact impli-  
35 cated in their evolutionary success [5]. A striking example is provided by  
36 phase polyphenism in locusts. Locusts are grasshoppers (Acrididae) that  
37 can transform between two extreme phenotypes known as the *solitarious*  
38 and *gregarious phase*, which differ profoundly in morphology, physiology  
39 and behaviour [6]. Solitarious-phase locusts are cryptic and shy, and avoid  
40 conspecifics; gregarious-phase locusts are active and mobile and seek out  
41 conspecifics, causing them to aggregate in swarms. Several distantly related  
42 grasshopper species show phase polyphenism, with migratory locusts (*Lo-*  
43 *custa migratoria*) and desert locusts (*Schistocerca gregaria*) being amongst  
44 the most extreme and economically relevant. The sole direct environmental  
45 driver of phase change is the presence or absence of conspecifics. Solitari-  
46 ous desert locusts acquire gregarious behaviour within a few hours of forced  
47 crowding [7,8]. Behavioural solitarisation of long-term gregarious locusts is  
48 markedly slower, indicating a consolidation of the gregarious state with pro-  
49 longed crowding. In desert locusts, phase state at hatching is additionally  
50 determined by trans-generational epigenetic inheritance [9].

51 Phase change in locusts provides an attractive model for addressing  
52 fundamental questions about the role of DNA methylation in behavioural  
53 plasticity. Neural DNA methylation could conceivably contribute to several  
54 different aspects of behavioural phase polyphenism. It could be part of the

55 effector cascade that initiates behavioural change; it could contribute to the  
56 consolidation of gregarious behaviour that occurs with prolonged crowding  
57 within a lifetime; and it could contribute to the inheritance of phase state  
58 across generations.

59 The DNA in locust central nervous systems is heavily methylated, which  
60 contrasts with an evolutionary loss of DNA (cytosine-5)-methyltransferase 3  
61 (DNMT3) [10, 11]. Methylation occurs on 1.6–1.9% of all genomic cytosines  
62 and on over 3% of the cytosines in exons (in *S. gregaria*; [11, 12]). These  
63 values are over tenfold higher than in honeybees, where DNMT3 is present  
64 and methylation is implicated in caste polyphenism [13–15], suggesting that  
65 DNA methylation has important functions in locust behaviour despite the  
66 evolutionary loss of DNMT3. A practical difficulty is the huge genome size  
67 of Acrididae. A reduced representation bisulphite sequencing study in the  
68 migratory locust (*Locusta migratoria*), as species with a fully sequenced  
69 genome of about 6.5 Gb, identified about 90 differentially methylated genes  
70 in the brains of solitary and gregarious nymphs [16]. The even bigger  
71 desert locust genome (8,55 Gb; [17]) remains yet to be sequenced.

72 In the present study, we analysed methylation-sensitive amplified frag-  
73 ment length polymorphisms (MS-AFLP) to compare the neural DNA methy-  
74 lation fingerprints of desert locusts with identical parental histories, but  
75 different individual social rearing histories. The study was designed to an-  
76 swer three questions. First, do long-term solitary and gregarious desert  
77 locusts show differences in their global pattern of neural DNA methylation,  
78 as was recently reported in migratory locusts [16]. This question is of in-  
79 terest because the two species are only distantly related and have evolved  
80 phase polyphenism independently [18]. The primary focus of our study, how-  
81 ever, was on whether the neural DNA methylation fingerprint changes over

82 a timescale of crowding that is sufficient for behavioural gregarisation. We  
83 therefore asked whether a day of crowding is sufficient to cause detectable  
84 changes in the neural DNA methylation fingerprint of solitary-reared locusts;  
85 and if so, whether the methylation fingerprint of these acutely gregarised lo-  
86 custs already resembles that of long-term gregarious locusts.

## 87 **Methods**

### 88 **Locust rearing and treatments**

89 Desert locusts (*Schistocerca gregaria* Forskål, 1775) were obtained from an in-  
90 bred gregarious colony at Leicester. Solitarious-phase locusts were produced  
91 from this stock by transferring them within a day of hatching into individual  
92 cages and rearing them in visual, tactile and olfactory isolation [19]. All lo-  
93 custs were maintained on a diet of fresh seedling wheat and dry wheat germ  
94 under a 12:12 photoperiod.

95 All locusts were virgin adults sacrificed 17–21 days after the final moult.  
96 Long-term gregarious (LTG) locusts were removed from the colony as final  
97 larval instars, sexed, and set up as one all-male and one all-female cohort of  
98 40 each in separate tanks ( $40 \times 30 \times 25 \text{ cm}^3$ ) in the controlled-environment  
99 room that also housed the solitarious locusts. Solitarious locusts were off-  
100 spring from a single gregarious mother (first-generation solitarious, 1GS).  
101 There were three treatment groups of four males and four females each:  
102 (i)  $n = 8$  1GS locusts that never experienced crowding; (ii)  $n = 8$  LTG  
103 locusts; and (iii)  $n = 8$  behaviourally gregarised 1GS locusts. These were  
104 produced by placing four male and four female 1GS locusts in the tanks  
105 that housed the 40 LTG virgins of the respective sex for 24 h before sacrifice.  
106 Locusts were sacrificed by decapitation and immediate dissection under ice-

107 cold saline. The brain (excluding the retinae) and the thoracic ganglia were  
108 dissected out and snap-frozen on dry ice.

### 109 **MS-AFLP analysis**

110 Differences in DNA methylation patterns were detected by MS-AFLP analy-  
111 sis in  $n = 4$  independent samples per treatment group, for a total of  $N = 12$   
112 samples. Each sample comprised the pooled brains and thoracic ganglia from  
113 one arbitrarily chosen male and female within the same treatment group.  
114 DNA was extracted with the QIAamp DNA Micro Kit (QIAGEN) following  
115 the manufacturer's instructions.

116 **Restriction digestion.** The MS-AFLP protocol was based on [20]. For  
117 each sample of genomic DNA, one 500 ng aliquot was digested with EcoRI  
118 and MspI by combining 3  $\mu$ l target DNA, 0.05  $\mu$ l EcoRI (20,000 units/ml),  
119 0.25  $\mu$ l MspI (20,000 units/ml), 1  $\mu$ l 10 $\times$  NEBuffer 4 and 5.7  $\mu$ l H<sub>2</sub>O); an-  
120 other 500 ng aliquot of genomic DNA was digested with EcoRI and HpaII  
121 by combining 3  $\mu$ l target DNA, 0.5  $\mu$ l EcoRI (20,000 units/ml), 0.5  $\mu$ l HpaII  
122 (10,000 units/ml), 1  $\mu$ l 10 $\times$  NEBuffer 1 and 5.45  $\mu$ l H<sub>2</sub>O) at 37°C for 3 h.

123 **Adapter ligation.** The EcoRI-MspI and EcoRI-HpaII restriction-digested  
124 products were ligated with EcoRI and HpaII-MspI adaptors (Table 1). The  
125 EcoRI adaptor was prepared from 5  $\mu$ l EcoRI-F and 5  $\mu$ l EcoRI-R, mixed  
126 in a final concentration of 5 pmol  $\mu$ l<sup>-1</sup> each; the HpaII-MspI adaptor was  
127 prepared from 25  $\mu$ l HpaII-MspI-F and 25  $\mu$ l HpaII-MspI-R, mixed in a final  
128 concentration of 50 pmol  $\mu$ l<sup>-1</sup> each. Both mixes were incubated at 65°C for  
129 10 min. For ligation, 3  $\mu$ l digested product was combined with 7  $\mu$ l of ligation  
130 reaction mixture (1  $\mu$ l EcoRI adaptor, 1  $\mu$ l HpaII-MspI adaptor, 0.25  $\mu$ l T4  
131 DNA ligase (400,000 units/ml), 1  $\mu$ l 10 $\times$  T4 ligase buffer (New England

132 Biolabs) and 3.75  $\mu$ l H<sub>2</sub>O) at 37°C for 3 h and then left overnight at room  
133 temperature. The ligation products were diluted with 100  $\mu$ l of H<sub>2</sub>O and  
134 used as the template for pre-amplification.

135 **Pre-amplification.** The pre-amplification PCR used 1  $\mu$ l of ligation prod-  
136 uct with 1  $\mu$ l each of EcoRIpre and HpaII-MspIpre primers (10 pmol ml<sup>-1</sup>;  
137 Table 1), and 7  $\mu$ l of the reaction mix (0.8  $\mu$ l 2.5 mM deoxynucleotide triphos-  
138 phates (dNTPs), 1  $\mu$ l 10 $\times$  Paq5000 Hot Start Reaction Buffer, 0.3  $\mu$ l Paq5000  
139 Hot Start DNA Polymerase (500 units), 0.8  $\mu$ l 25 mM MgCl<sub>2</sub>, 4.1  $\mu$ l sterile  
140 H<sub>2</sub>O). The PCR conditions were 94°C for 2 min, followed by 20 cycles of 94°C  
141 for 30 s, 60°C for 1 min and 72°C for 1 min, followed by a final extension of  
142 5 min at 72°C. 3  $\mu$ l of each PCR product was run on 3% agarose gel and ap-  
143 pearance of a smear of DNA on the gel indicated that the pre-amplification  
144 PCR was successful.

145 **Selective amplification.** Seven  $\mu$ l of PCR products were diluted with  
146 93  $\mu$ l of H<sub>2</sub>O and used as the template for selective amplification. We used  
147 four different selective EcoRI primers and three different HpaII-MspI primers  
148 (Table 1), giving twelve unique EcoRI/HpaII-MspI primer pair combinations.  
149 In order to reduce the number of bands in the subsequent gel electrophoresis  
150 to a manageable number, each primer combination was used in a separate  
151 PCR, giving twelve PCR products per sample that were subsequently run  
152 on separate gels. The selective PCR reaction mixtures contained 1  $\mu$ l pre-  
153 amplified product, 1  $\mu$ l each of one of the HpaII-MspI primers and of one of  
154 the EcoRI primers (10 pmol ml<sup>-1</sup>) and 7  $\mu$ l reaction mix (same as used for  
155 pre-amplification). PCR conditions were: (i) 94°C for 2 min; (ii) 13 cycles  
156 of 30 s at 94°C, 30 s at 65°C (0.7°C reduction per cycle) and 1 min at 72°C;  
157 (iii) 23 cycles of 30 s at 94°C, 30 s at 56°C and 1 min at 72°C; and (iv) a

158 final extension at 72°C for 5 min followed by a holding step at 4°C.

159 **Gel electrophoresis.** PCR products were diluted with 100 µl H<sub>2</sub>O. 10 µl  
160 of diluted PCR product was mixed with 3 µl 1× loading buffer (Elchrom  
161 Scientific, Cham, Switzerland) and run on 9% poly(NAT) gels (Elchrom) on  
162 an Elchrom ORIGINS electrophoresis system (120 V, 81 min at 55°C). Gels  
163 were stained in the dark with SYBR® Gold (Invitrogen; 1:10,000 in TAE  
164 buffer) followed by destaining in 100 ml TAE buffer alone.

165 **Statistical analysis.** Bands were scored automatically as either present  
166 or absent by the Java program GelJ [21]. Positions of loci are reported as  
167 molecular weights (base pairs). GelJ matches bands across different gel lanes  
168 based on a user-specified tolerance value (in base pairs) below which bands  
169 are considered identical. To ensure that our results were not sensitive to  
170 this arbitrary tolerance level, we generated matrices of band scores using  
171 tolerance values of 1–40 using custom R scripts. The resulting matrices were  
172 analysed for differentiation between groups by principal coordinates analysis  
173 (PCoA) and by analysis of molecular variance (AMOVA) in the R package  
174 *msap* [22]. We investigated the sensitivity of the  $\phi_{ST}$  value to the choice of  
175 tolerance value. This identified a broad range of tolerances which gave the  
176 same robust result (see Results and Discussion). Finally, to ensure that the  
177  $\phi_{ST}$  values generated across this range of tolerance values were not due to  
178 chance, we compared  $\phi_{ST}$  from the real data with bootstrapped  $\phi_{ST}$  values  
179 from data generated by random sampling with replacement ( $N = 1,000$ ).

180 All R scripts used are available at <https://dx.doi.org/10.6084/m9.figshare.3168760.v1>.

181 All statistical analysis was carried out in R 3.2.3 [23].



## 182 Results and Discussion

183 Our analysis of the MS-AFLP patterns across solitary-reared, 24 h crowded  
184 and crowd-reared locusts indicated clear differences between the three groups.  
185 This result was robust across a range of band scoring tolerances — the dis-  
186 tance up to which bands in a given gel position are matched as identical  
187 between samples (Figure 1). As expected, tolerance had some effect on our  
188 results. At low tolerances ( $<10$  bp), a large fraction of the bands within each  
189 sample are treated as unique, leading to low calculated levels of differentia-  
190 tion between the groups ( $\phi_{ST}$ ). Tolerances in the range of 10–25 bp produced  
191 robust  $\phi_{ST}$  values of approximately 0.2. The principal coordinate analysis  
192 for each of these tolerance levels is shown in Supplementary Figures S1–S3.  
193 Above this range,  $\phi_{ST}$  began to drop. This is to be expected, as bands that  
194 represent genuinely different fragments will now be grouped together, leading  
195 to less apparent differentiation between groups. This pattern of increasing  
196 and then decreasing  $\phi_{ST}$  is not due to chance as the bootstrapped data, gen-  
197 erated by random sampling with replacement, do not show a similar pattern.  
198 Importantly, across the entire range of tolerances, the  $\phi_{ST}$  values obtained  
199 in the real data (red points in Figure 1) are well outside the bootstrapped  
200  $\phi_{ST}$  distributions (grey points and black boxplots in Figure 1).

201 The following analysis is based on a tolerance value of 10 bp. This  
202 identified 294 unique AFLP bands (loci); of these, 282 were identified as  
203 methylation-susceptible based on different digestion patterns with HpaII and  
204 MspI, and 162 showed different banding patterns between individual samples  
205 (MS-polymorphic loci). Crowd-reared locusts had a slightly higher propor-  
206 tion of unmethylated loci (16.3%) than solitary-reared locusts (11.8%). Con-  
207 versely, the proportion of hypermethylated loci was slightly higher in solitary-  
208 reared locusts (65.6%) than in crowd-reared gregarious locusts (55.9%). Acutely

209 crowded solitary-reared locusts showed proportions of methylation that were  
210 intermediate (Table 2). The three treatment groups showed significant multi-  
211 locus differentiation in their methylation fingerprints (AMOVA,  $\phi_{ST} = 0.2264$ ,  
212  $p = 0.0002$ ). Figure 2 gives a simplified representation of the multi-locus  
213 differentiation between the samples. The two axes represent the first two  
214 principal coordinates, which together explained 35.1% of the total variation.

215 A pair-wise comparison between crowd-reared and solitary-reared locusts  
216 identified significant epigenetic differentiation ( $\phi_{ST} = 0.2810$ ,  $p = 0.0291$ ),  
217 indicating that phase change in desert locusts entails modification of the  
218 neural DNA methylation pattern. This is maybe the least surprising of our  
219 results, considering that differences in brain DNA methylation between long-  
220 term phases have been previously reported in the distantly related migratory  
221 locust *L. migratoria* [16]. The differences observed in our experiment arose  
222 within a single generation, because we used solitary-reared locusts that were  
223 the direct offspring of long-term gregarious parents. It would now be inter-  
224 esting to see whether isolation over multiple generations further deepens the  
225 epigenetic differences between the two phases.

226 Our key finding, however, is that crowding solitary-reared locusts for  
227 24 h resulted in a neural DNA methylation fingerprint that was distinctly  
228 different both from uncrowded solitary-reared locusts ( $\phi_{ST} = 0.2381$ ,  $p =$   
229  $0.0283$ ) and from crowd-reared locusts ( $\phi_{ST} = 0.166$ ,  $p = 0.0288$ ). This  
230 uncovers a disjunct between the global neural DNA methylation pattern  
231 and the behavioural phase state. Although one day of crowding is sufficient  
232 to establish fully gregarious behaviour [7, 8], we find that the neural MS-  
233 AFLP fingerprint is at this point still markedly different from that in long-  
234 term gregarious locusts. Interestingly, the data points from 24 h crowded  
235 samples were set apart from the solitary-reared samples and the crowd-reared

236 samples by shifts along both of the first two principal coordinate axes (Figure  
237 2). Although the exact position of the group centroids relative to the two  
238 axes depended on the tolerance value used in the band scoring algorithm, a  
239 clear triangular separation was maintained across the entire range of sensible  
240 tolerance values (Supplementary Figures S1–S3). In other words, the three  
241 groups never fell along a single line in the PCoA plots. We interpret this  
242 as evidence that the methylation patterns seen after 24 h of crowding are  
243 not simply intermediate between the two extremes, but reflect a distinct  
244 transitional epigenetic state.

245 The further changes in methylation that occur only some time after the  
246 first 24 h of crowding must then be mechanistically unrelated to the transi-  
247 tion to, or expression of, gregarious behaviour. Previous behavioural studies  
248 have shown that the resilience of gregarious behaviour to re-isolation in-  
249 creases with time spent in crowded conditions [19, 24]. When solitary  
250 locusts are re-isolated after 24–48 h of crowding, they return to fully solitar-  
251 ious behaviour within 8 h. Long-term gregarious locusts, however, solitarise  
252 only partially when isolated for four days as final instar nymphs. Some of  
253 these late changes in methylation pattern may therefore represent consol-  
254 idation mechanisms by which neurochemically mediated rapid changes in  
255 behaviour [25] become more stable with time. However, differential DNA  
256 methylation may also underpin long-term phase differences in the CNS that  
257 are not directly responsible for generating phase-specific behaviour but rep-  
258 resent adaptations to the respective life styles.

259 Our present results add to previous evidence for the existence of mecha-  
260 nistically distinct transitional phase states at different levels from the molecu-  
261 lar to the behavioural. On a neurotransmitter level, serotonin concentrations  
262 in the CNS show a marked transient increase in the thoracic ganglia within

263 the first few hours of crowding that has been causally linked to the transi-  
264 tion to gregarious behaviour [25]. This is followed by an equally transient  
265 increase in the brain around 24 h [26]. On a neuronal level, acute and chronic  
266 crowding also have differential effects on serotonin-synthesising neurones, with  
267 one set of neurones responding to acute crowding with increased serotonin  
268 expression and a distinct set showing decreased serotonin expression in the  
269 long term [27]. Even on a behavioural level, when forming new associations  
270 between unfamiliar odours and toxic food, recently gregarised locusts differ  
271 from both long-term phases, in a way that matches their respective distinct  
272 ecological requirements [28–30].

273 In conclusion, our results demonstrate that phase change in desert lo-  
274 custs is associated with distinct short- and longterm shifts in the neural  
275 DNA methylation fingerprint. A purely associative study like ours cannot  
276 prove causal connections between methylation and behaviour. However, an  
277 important consequence of our findings for future studies is that uncovering  
278 such causal connections will require analyses of transitional stages rather  
279 than only comparisons of endpoints [16] because the transitional states are  
280 not simply partial realisations of the endpoints.

## 281 **Acknowledgements**

282 Supported by research grants F/09 364/K from the Leverhulme Trust, UK  
283 (to SRO), BB/L02389X/1 from the Biotechnology and Biological Sciences  
284 Research Council, UK (to SRO) and NE/N010019/1 from the Natural Envi-  
285 ronment Research Council, UK (to EBM). We thank Alice Round and Carl  
286 Breaker for managing our locust facilities.

## 287 **Additional Information**

### 288 **Authors' contributions**

289 SRO and EBM conceived the study and designed the experiments. SRO  
290 carried out the animal treatments and dissections. HEA carried out all MS-  
291 AFLP bench-work and initial gel analysis and prepared the first draft. EBM  
292 and SRO performed statistical analyses. SRO wrote the final draft with  
293 input from HEA and EBM. All authors gave final approval for publication.

### 294 **Competing financial interests**

295 The authors declare no competing financial interests.

## 296 **References**

- 297 1. Szyf M, McGowan P, Meaney MJ. 2008 The social environment and the  
298 epigenome. *Environ. Mol. Mutagen.* **49**, 46–60. (doi:10.1002/em.20357)
- 299 2. Day JJ, Childs D, Guzman-Karlsson MC, Kibe M, Moulden J, Song E,  
300 Tahir A, Sweatt JD. 2013 DNA methylation regulates associative reward  
301 learning. *Nat. Neurosci.* **16**, 1445–1452. (doi:10.1038/nn.3504)
- 302 3. Yan H, Simola DF, Bonasio R, Liebig J, Berger SL, Reinberg D. 2014  
303 Eusocial insects as emerging models for behavioural epigenetics. *Nat.*  
304 *Rev. Genet.* **15**, 677–688. (doi:10.1038/nrg3787)
- 305 4. Isles AR. 2015 Neural and behavioral epigenetics; what it is, and what  
306 is hype. *Genes, Brains Behav.* **14**, 64–72. (doi:10.1111/gbb.12184)
- 307 5. Simpson SJ, Sword GA, Lo N. 2011 Polyphenism in insects. *Curr. Biol.*  
308 **21**, R738–49. (doi:10.1016/j.cub.2011.06.006)

- 309 6. Pener MP, Simpson SJ. 2009 Locust phase polyphenism: An update.  
310 *Adv. Insect Physiol.* **36**, 1–272. (doi:10.1016/S0065-2806(08)36001-9)
- 311 7. Roessingh P, Simpson SJ. 1994 The time-course of behavioural phase  
312 change in nymphs of the desert locust, *Schistocerca gregaria*. *Physiol.*  
313 *Entomol.* **19**, 191–197. (doi:10.1111/j.1365-3032.1994.tb01042.x)
- 314 8. Bouaïchi A, Roessingh P, Simpson SJ. 1995 An analysis of the  
315 behavioral-effects of crowding and re-isolation on solitary-reared adult  
316 desert locusts (*Schistocerca gregaria*) and their offspring. *Physiol. Ento-*  
317 *mol.* **20**, 199–208. (doi:10.1111/j.1365-3032.1995.tb00002.x)
- 318 9. Islam MS, Roessingh P, Simpson S, McCaffery A. 1994 Effects of popu-  
319 lation density experienced by parents during mating and oviposition on  
320 the phase of hatchling desert locusts, *Schistocerca gregaria*. *Proc. Biol.*  
321 *Sci.* **257**, 93–98. (doi:10.1098/rspb.1994.0099)
- 322 10. Robinson KL, Tohidi-Esfahani D, Lo N, Simpson SJ, Sword GA. 2011  
323 Evidence for widespread genomic methylation in the migratory locust,  
324 *Locusta migratoria* (Orthoptera: Acrididae). *PLoS ONE* **6**, e28167. (doi:  
325 10.1371/journal.pone.0028167)
- 326 11. Falckenhayn C, Boerjan B, Raddatz G, Frohme M, Schoofs L, Lyko  
327 F. 2013 Characterization of genome methylation patterns in the desert  
328 locust *Schistocerca gregaria*. *J. Exp. Biol.* **216**, 1423–1429. (doi:  
329 10.1242/jeb.080754)
- 330 12. Boerjan B, *et al.* 2011 Locust phase polyphenism: Does epigenetic pre-  
331 ceede endocrine regulation? *Gen. Comp. Endocr.* **173**, 120–128. (doi:  
332 10.1016/j.ygcen.2011.05.003)

- 333 13. Kucharski R, Maleszka J, Foret S, Maleszka R. 2008 Nutritional control  
334 of reproductive status in honeybees via DNA methylation. *Science* **319**,  
335 1827–1830. (doi:10.1126/science.1153069), 5871
- 336 14. Lyko F, Foret S, Kucharski R, Wolf S, Falckenhayn C, Maleszka  
337 R. 2010 The honey bee epigenomes: differential methylation of  
338 brain DNA in queens and workers. *PLoS Biol.* **8**, e1000506. (doi:  
339 10.1371/journal.pbio.1000506)
- 340 15. Herb BR, Wolschin F, Hansen KD, Aryee MJ, Langmead B, Irizarry R,  
341 Amdam GV, Feinberg AP. 2012 Reversible switching between epigenetic  
342 states in honeybee behavioral subcastes. *Nat. Neurosci.* **15**, 1371–1373.  
343 (doi:10.1038/nn.3218)
- 344 16. Wang X, *et al.* 2014 The locust genome provides insight into swarm  
345 formation and long-distance flight. *Nat. Commun.* **5**, 2957. (doi:  
346 10.1038/ncomms3957)
- 347 17. Camacho JPM, Ruiz-Ruano FJ, Martín-Blázquez R, López-León MD,  
348 Cabrero J, Lorite P, Cabral-de Mello DC, Bakkali M. 2014 A step to the  
349 gigantic genome of the desert locust: chromosome sizes and repeated  
350 DNAs. *Chromosoma* (doi:10.1007/s00412-014-0499-0)
- 351 18. Song H, Wenzel JW. 2008 Phylogeny of bird-grasshopper subfamily  
352 cyrtacanthacridinae (orthoptera: Acrididae) and the evolution of lo-  
353 cust phase polyphenism. *Cladistics* **24**, 515–542. (doi:10.1111/j.1096-  
354 0031.2007.00190.x)
- 355 19. Roessingh P, Simpson SJ, James S. 1993 Analysis of phase-related  
356 changes in behaviour of desert locust nymphs. *Proc. Biol. Sci.* **252**, 43–  
357 49. (doi:10.1098/rspb.1993.0044)

- 358 20. Kronforst M, Gilley D, Strassmann J, Queller DC. 2008 DNA methy-  
359 lation is widespread across social Hymenoptera. *Curr. Biol.* **18**, R287–  
360 R288. (doi:10.1016/j.cub.2008.02.015)
- 361 21. Heras J, Dominguez C, Mata E, Pascual V, Lozano C, Torres C, Zarazaga  
362 M. 2015 GelJ—a tool for analyzing DNA fingerprint gel images. *BMC*  
363 *Bioinformatics* **16**, 270. (doi:10.1186/s12859-015-0703-0)
- 364 22. Pérez-Figueroa A. 2013 MspA: a tool for the statistical analysis of  
365 methylation-sensitive amplified polymorphism data. *Mol. Ecol. Resour.*  
366 **13**, 522–527. (doi:10.1111/1755-0998.12064)
- 367 23. R Core Team. 2015 *R: A Language and Environment for Statistical Com-*  
368 *puting*, R Foundation for Statistical Computing, Vienna, Austria
- 369 24. Simpson SJ, McCaffery AR, Hägele BF. 1999 A behavioural analysis  
370 of phase change in the desert locust. *Biol. Rev.* **74**, 461–480. (doi:  
371 10.1111/j.1469-185X.1999.tb00038.x)
- 372 25. Anstey ML, Rogers SM, Ott SR, Burrows M, Simpson SJ. 2009 Serotonin  
373 mediates behavioral gregarization underlying swarm formation in desert  
374 locusts. *Science* **323**, 627–630. (doi:10.1126/science.1165939)
- 375 26. Rogers SM, Matheson T, Sasaki K, Kendrick K, Simpson SJ, Burrows M.  
376 2004 Substantial changes in central nervous system neurotransmitters  
377 and neuromodulators accompany phase change in the locust. *J. Exp.*  
378 *Biol.* **207**, 3603–3617. (doi:10.1242/jeb.01183)
- 379 27. Rogers SM, Ott SR. 2015 Differential activation of serotonergic neurons  
380 during short- and long-term gregarization of desert locusts. *Proc. Biol.*  
381 *Sci.* **282**, 20142062. (doi:10.1098/rspb.2014.2062)



- 382 28. Despland E, Simpson SJ. 2005 Food choices of solitary and gregari-  
383 ous locusts reflect cryptic and aposematic antipredator strategies. *Anim.*  
384 *Behav.* **69**, 471–479. (doi:10.1016/j.anbehav.2004.04.018)
- 385 29. Despland E, Simpson SJ. 2005 Surviving the change to warning coloura-  
386 tion: density-dependent polyphenism suggests a route for the evolution  
387 of aposematism. *Chemoecology* **15**, 69–75. (doi:10.1007/s00049-005-  
388 0296-6)
- 389 30. Simões PMV, Niven JE, Ott SR. 2013 Phenotypic transformation affects  
390 associative learning in the desert locust. *Curr. Biol.* **23**, 2407–2412. (doi:  
391 10.1016/j.cub.2013.10.016)

## 392 Tables

**Table 1.** Sequences of ligation adapters, pre-amplification primers and selective amplification primers.

| <i>Ligation adapters</i>               |                           |
|----------------------------------------|---------------------------|
| EcoRI-F                                | 5'-CTCGTAGACTGCGTACC-3'   |
| EcoRI-R                                | 5'-AATTGGTACGCAGTCTAC-3'  |
| HpaII-MspI-F                           | 5'-GACGATGAGTCTAGAA-3'    |
| HpaII-MspI-R                           | 5'-CGTTCTAGACTCATC-3'     |
| <i>Pre-amplification primers</i>       |                           |
| EcoRI (+0)                             | 5'-GACTGCGTACCAATTC-3'    |
| HpaII-MspI (+A)                        | 5'-GATGAGTCTAGAACGGA-3'   |
| <i>Selective amplification primers</i> |                           |
| Eco-AA                                 | 5'-GACTGCGTACCAATTCAA-3'  |
| Eco-AT                                 | 5'-GACTGCGTACCAATTCAT-3'  |
| Eco-AG                                 | 5'-GACTGCGTACCAATTCAG-3'  |
| Eco-AC                                 | 5'-GACTGCGTACCAATTCAC-3'  |
| HpaII-MspI-AAT                         | 5'-GATGAGTCTAGAACGGAAT-3' |
| HpaII-MspI-ACT                         | 5'-GATGAGTCTAGAACGGACT-3' |
| HpaII-MspI-ATC                         | 5'-GATGAGTCTAGAACGGATC-3' |

**Table 2.** Proportion of methylation-sensitive restriction band patterns found in the CNS of locusts of different phase state, and their corresponding methylation status; methylated cytosines are indicated in bold type.

<sup>a</sup> + and – indicate the presence and absence, respectively, of a band following digestion with HpaII or MspI.

<sup>b</sup> may indicate methylation of either outer or both cytosines on one strand.

<sup>c</sup> HPA– / MSP– was taken to indicate hypermethylation rather than absence of target due to a genetic mutation [22].

| Banding pattern <sup>a</sup> | Methylation         |                                     | solitary | 24 h crowded | crowd-reared |
|------------------------------|---------------------|-------------------------------------|----------|--------------|--------------|
| HPA+ / MSP+                  | none:               | 5′-CCGG<br>GGCC-5′                  | 11.8%    | 15.0%        | 16.3%        |
| HPA+ / MSP–                  | hemi: <sup>b</sup>  | 5′- <b>CC</b> GG<br>GGCC-5′         | 10.1%    | 11.6%        | 13.4%        |
| HPA– / MSP+                  | full internal:      | 5′-CCGG<br><b>GGCC</b> -5′          | 12.5%    | 12.2%        | 14.4%        |
| HPA– / MSP–                  | hyper: <sup>c</sup> | 5′- <b>CC</b> GG<br><b>GGCC</b> -5′ | 65.6%    | 61.2%        | 55.9%        |

## 393 Figure Captions

394 Figure 1. Sensitivity of our analysis to the tolerance value used for matching  
395 bands between samples.  $\phi_{ST}$  represents the apparent degree of differentia-  
396 tion between the groups (solitary-reared, crowd-reared, and solitary-reared  
397 crowded for 24 h) and is plotted over the range of tolerance values (in base  
398 pairs). The red points represent  $\phi_{ST}$  values calculated from our real data.  
399 The grey points, those calculated from  $N = 1000$  bootstrapped data sets  
400 (generated by random sampling with replacement).

401 Figure 2. Principal Coordinate Analysis (PCoA) of epigenetic differentiation  
402 between uncrowded solitary-reared locusts (S), long-term gregarious locusts  
403 (G) and solitary-reared locusts crowded for 24 h (C), as identified by MS-  
404 AFLP (10 bp band matching tolerance). The first two coordinates (C1,  
405 C2) are shown with the percentage of variance explained by them. Group  
406 labels show the centroid for each group, points correspond to individual MS-  
407 AFLP samples, ellipses represent their average dispersion around the group  
408 centroids.

409 **Figures**

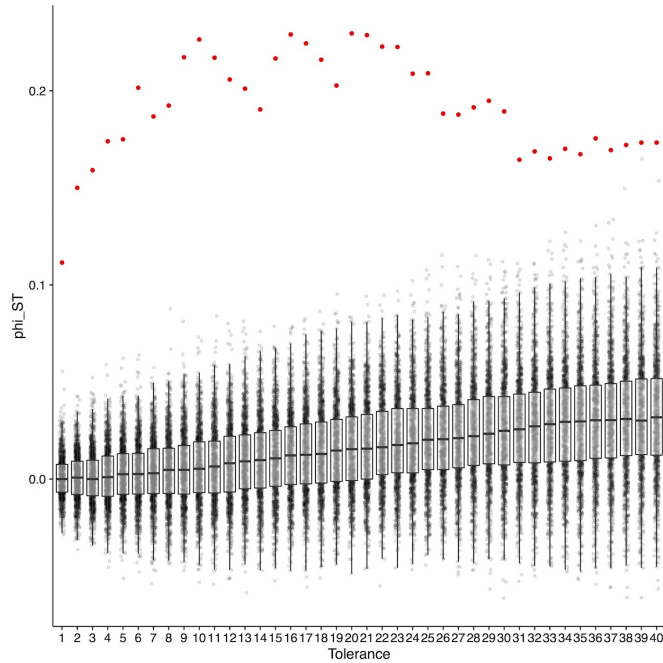

**Figure 1.** Sensitivity of our analysis to the tolerance value used for matching bands between samples.  $\phi_{ST}$  represents the apparent degree of differentiation between the groups (solitary-reared, crowd-reared, and solitary-reared crowded for 24 h) and is plotted over the range of tolerance values (in base pairs). The red points represent  $\phi_{ST}$  values calculated from our real data. The grey points, those calculated from  $N = 1000$  bootstrapped data sets (generated by random sampling with replacement).

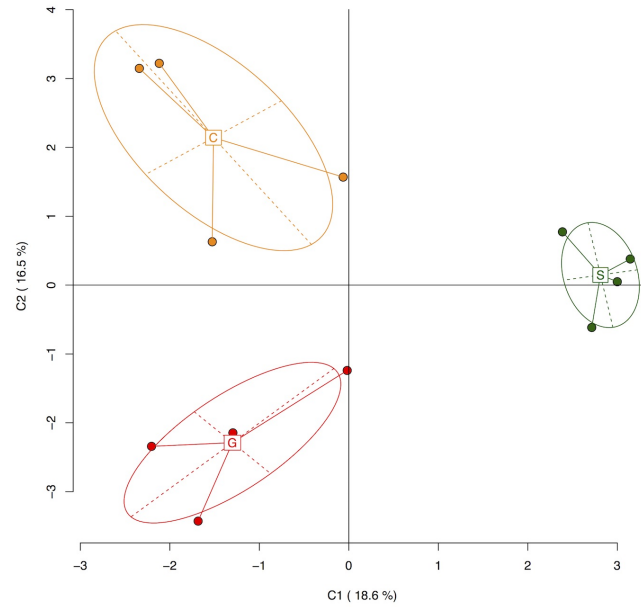

**Figure 2.** Principal Coordinate Analysis (PCoA) of epigenetic differentiation between uncrowded solitary-reared locusts (S), long-term gregarious locusts (G) and solitary-reared locusts crowded for 24 h (C), as identified by MS-AFLP (10 bp band matching tolerance). The first two coordinates (C1, C2) are shown with the percentage of variance explained by them. Group labels show the centroid for each group, points correspond to individual MS-AFLP samples, ellipses represent their average dispersion around the group centroids.
